# Supplementary material for: TERT promoter mutations and monoallelic activation of TERT in cancer
Source: PubMed Central journal article supplement (PMC4688396; doi:10.1038/oncsis.2015.39), 2015-12-14

Supp Fig 2

### TERT Expression by Mutation Status

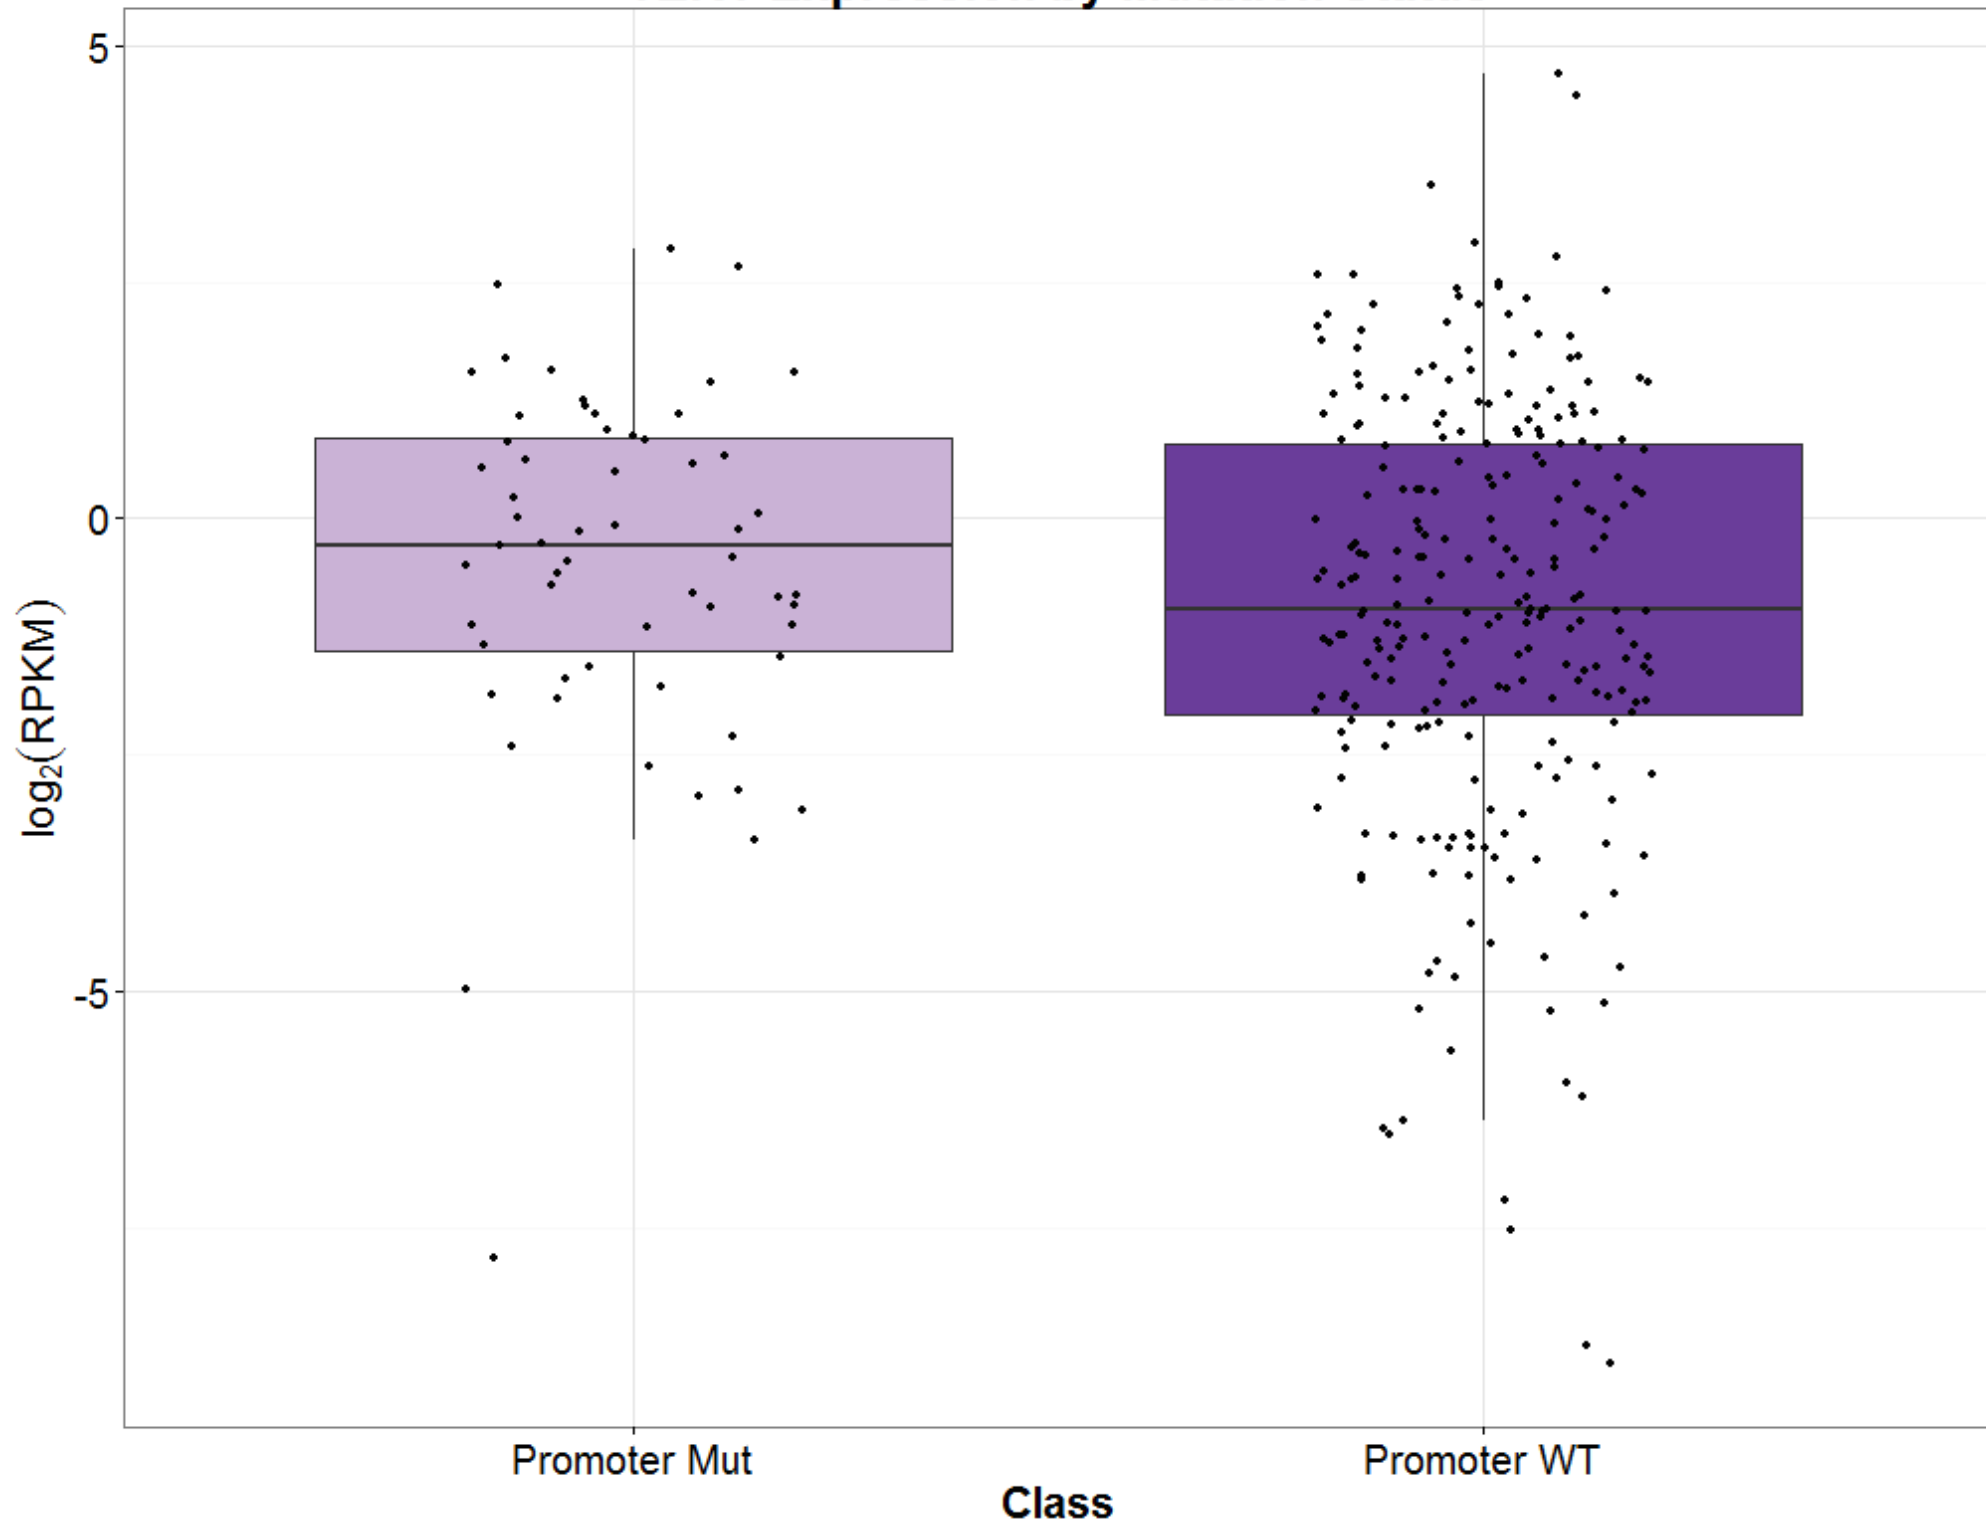

Supplement: oncsis201539x2.pdf [file oncsis201539x2.pdf]
